# Supplementary figures and images for: A Facile Preparation of Environmentally-Benign and Flame-Retardant Coating on Wood by Comprising Polysilicate and Boric Acid
Source: Research Square preprint supplement (doi:10.21203/rs.3.rs-528431/v1), 2021-05-27

**Graphical abstract**

**
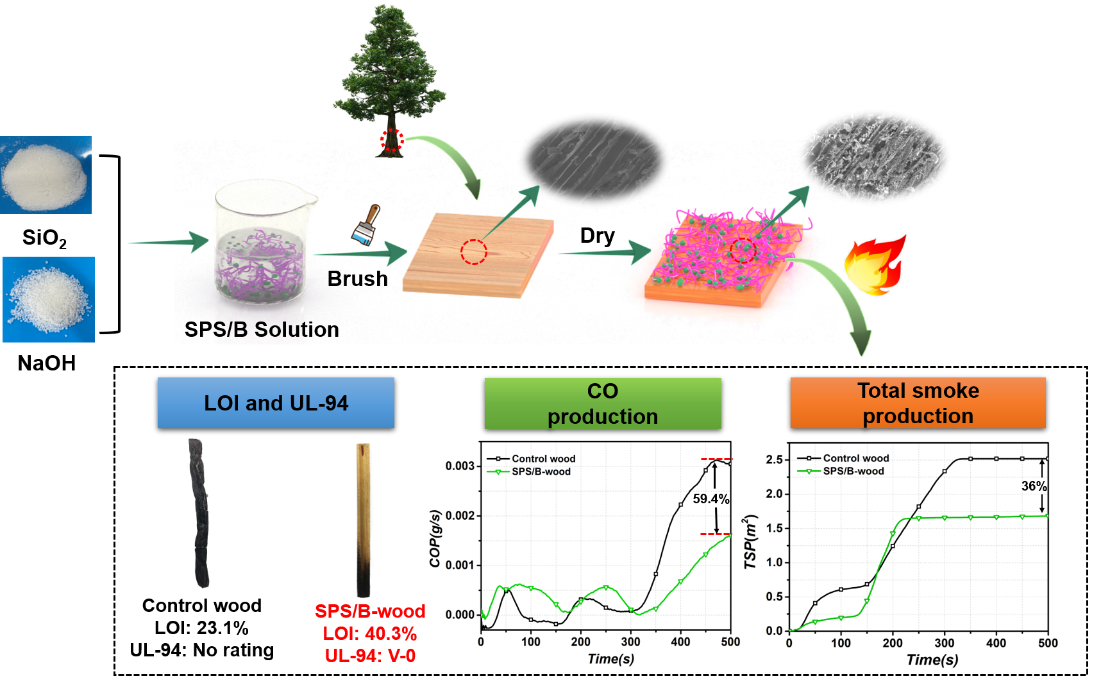
**

Supplement: Supplementary file 1 [file d93b2c5bc09820f5c4db80dc.docx]
